# Supplementary material
Source: PubMed Central journal article supplement (PMC3946885)
Supplement: NIHMS526720-supplement-01.pdf [file NIHMS526720-supplement-01.pdf]

**Table S1. Multivariable adjusted hazard ratios (95% confidence intervals)\* for proportional hazards model for other outcomes.**

| Risk factors                      | Category   | eGFR<15              | eGFR halving and <15 | eGFR drop 20       | eGFR halving or drop 20 | eGFR drop 25% and change CKD stage |
|-----------------------------------|------------|----------------------|----------------------|--------------------|-------------------------|------------------------------------|
| Age                               | 45-64      | 0.70 (0.57, 0.87)    | 0.65 (0.53, 0.81)    | 0.92 (0.76, 1.11)  | 0.87 (0.72, 1.04)       | 1.04 (0.89, 1.23)                  |
|                                   | 65+        | 0.62 (0.48, 0.79)    | 0.55 (0.42, 0.70)    | 0.78 (0.63, 0.98)  | 0.74 (0.60, 0.93)       | 1.09 (0.90, 1.32)                  |
| Sex                               | Female     | 0.97 (0.83, 1.13)    | 0.90 (0.77, 1.05)    | 0.96 (0.84, 1.10)  | 0.96 (0.84, 1.09)       | 1.07 (0.96, 1.20)                  |
| Race                              | Black      | 1.57 (1.33, 1.85)    | 1.61 (1.36, 1.91)    | 1.33 (1.15, 1.54)  | 1.36 (1.18, 1.57)       | 1.21 (1.07, 1.36)                  |
|                                   | Other      | 1.69 (1.32, 2.16)    | 1.66 (1.29, 2.14)    | 1.49 (1.20, 1.85)  | 1.44 (1.16, 1.78)       | 1.26 (1.06, 1.50)                  |
| Diabetes                          | Yes        | 1.27 (1.07, 1.49)    | 1.38 (1.17, 1.64)    | 1.31 (1.14, 1.51)  | 1.35 (1.18, 1.56)       | 1.25 (1.11, 1.41)                  |
| eGFR (ml/min/1.73m <sup>2</sup> ) | 45-<60     | 3.52 (1.75, 7.07)    | 3.57 (1.78, 7.17)    | 0.81 (0.64, 1.02)  | 0.81 (0.64, 1.03)       | 1.55 (1.26, 1.91)                  |
|                                   | 30-<45     | 10.95 (5.58, 21.51)  | 11.47 (5.84, 22.54)  | 0.66 (0.52, 0.85)  | 0.76 (0.60, 0.97)       | 1.63 (1.31, 2.01)                  |
|                                   | <30        | 43.61 (22.06, 86.21) | 33.39 (16.86, 66.13) | 1.22 (0.94, 1.58)  | 1.54 (1.19, 1.98)       | 1.59 (1.26, 2.01)                  |
| 24 hour urine protein (g/day)     | 0.10-<0.50 | 1.73 (1.27, 2.37)    | 1.91 (1.37, 2.66)    | 1.65 (1.32, 2.06)  | 1.61 (1.29, 2.00)       | 1.60 (1.36, 1.88)                  |
|                                   | 0.50-<1.50 | 4.83 (3.57, 6.53)    | 4.77 (3.45, 6.60)    | 3.86 (3.07, 4.85)  | 3.84 (3.07, 4.81)       | 3.58 (3.01, 4.26)                  |
|                                   | 1.50+      | 11.19 (8.32, 15.06)  | 11.64 (8.48, 15.99)  | 9.36 (7.47, 11.73) | 9.09 (7.29, 11.32)      | 7.32 (6.14, 8.71)                  |

\* All models were adjusted for ABI, uric acid, history of CVD, BMI, hypertension, hemoglobin, education and smoking status at baseline.
